# Supplementary material for: Red mud modified with graphene oxide for enhanced visible-light-driven photocatalytic performance towards the degradation of antibiotics
Source: Royal Society of Chemistry journal article supplement (doi:10.1039/c9nj04697f), 2019-01-01
Supplement: c9nj04697f1.pdf [file c9nj04697f1.pdf]

# Red mud modified with graphene oxide for enhanced visible-light-driven photocatalytic performance towards the degradation of antibiotic

## Supporting Information

Hongji Ren,<sup>ab</sup> Yubin Tang,<sup>a\*</sup> Weilong Shi,<sup>c</sup> Fangyan Chen,<sup>a</sup> Yusong Xu,<sup>b</sup>

<sup>a</sup> School of Environmental and Chemical Engineering, Jiangsu University of Science and Technology, Zhenjiang, 212003, PR. China.

<sup>b</sup> School of Metallurgy and Materials Engineering, Jiangsu University of Science and Technology, Zhangjiagang, 215600, PR. China.

<sup>c</sup> School of Material science and Engineering, Jiangsu University of Science and Technology, Zhenjiang, 212003, PR. China.

**Table S1** pH values of photocatalytic degradation of reaction solution (TC solution, 10 mg/L) containing as-prepared products.

| Samples | RM-raw | RM-1GO | RM-3GO | RM-5GO | RM-7GO | RM-10GO |
|---------|--------|--------|--------|--------|--------|---------|
| pH      | 6.9    | 6.9    | 6.9    | 6.9    | 6.9    | 6.9     |

**Table.S2** Chemical composition of RM-raw (mass fraction, %).

| Al <sub>2</sub> O <sub>3</sub> | CaO   | SiO <sub>2</sub> | Na <sub>2</sub> O | TiO <sub>2</sub>              | Fe <sub>2</sub> O <sub>3</sub> | K <sub>2</sub> O | SO <sub>3</sub>                | MgO  |
|--------------------------------|-------|------------------|-------------------|-------------------------------|--------------------------------|------------------|--------------------------------|------|
| 28.2                           | 23.7  | 22.6             | 8.33              | 5.46                          | 4.59                           | 3.32             | 1.86                           | 1.21 |
| P <sub>2</sub> O <sub>5</sub>  | SrO   | ZrO <sub>2</sub> | Cl                | Y <sub>2</sub> O <sub>3</sub> | Nb <sub>2</sub> O <sub>5</sub> | NiO              | As <sub>2</sub> O <sub>3</sub> |      |
| 0.259                          | 0.214 | 0.183            | 0.0657            | 0.0229                        | 0.0221                         | 0.0199           | 0.0142                         |      |

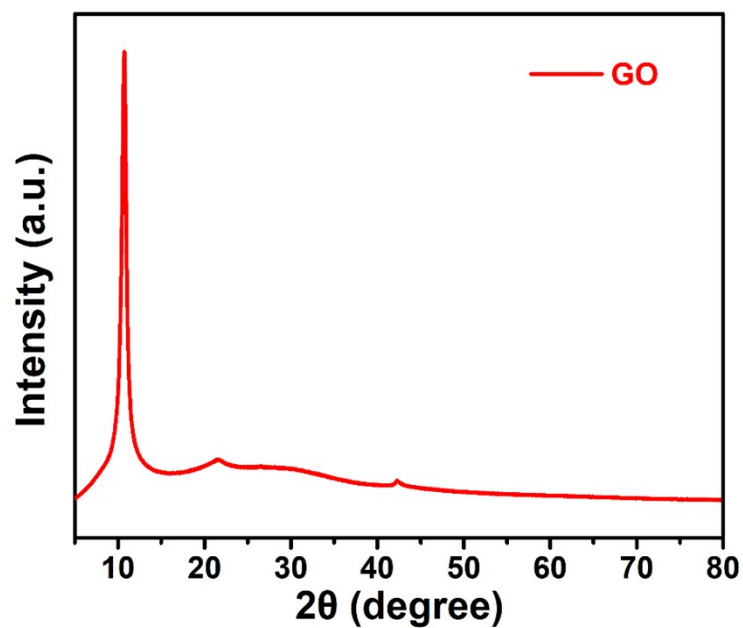

Fig.S1 XRD pattern of GO.

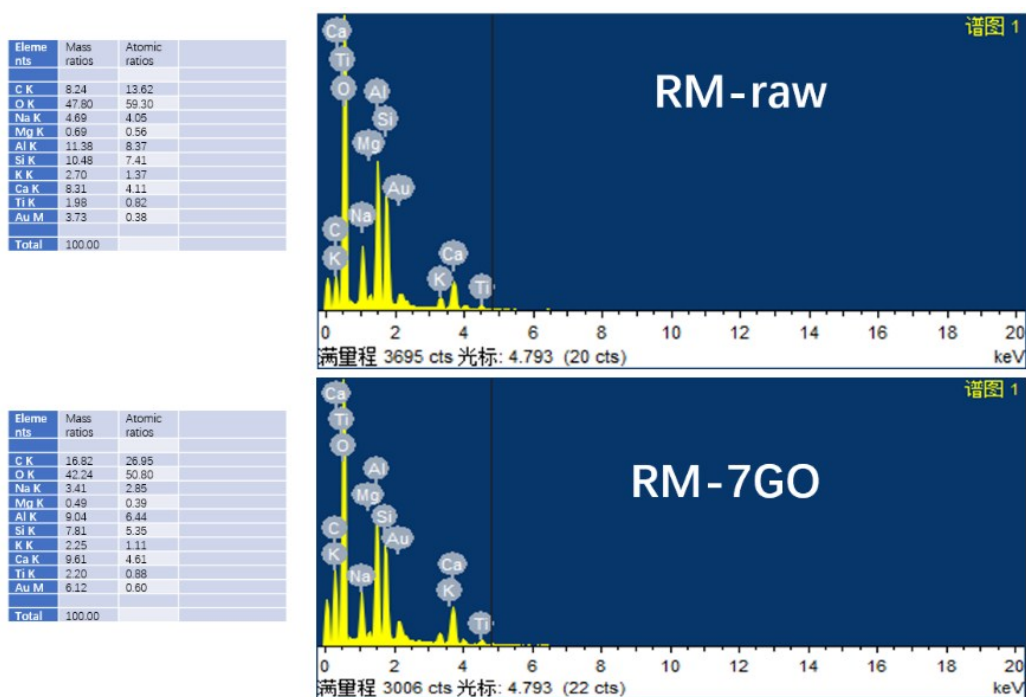

Fig.S2 EDX spectra of RM-raw and RM-7GO.

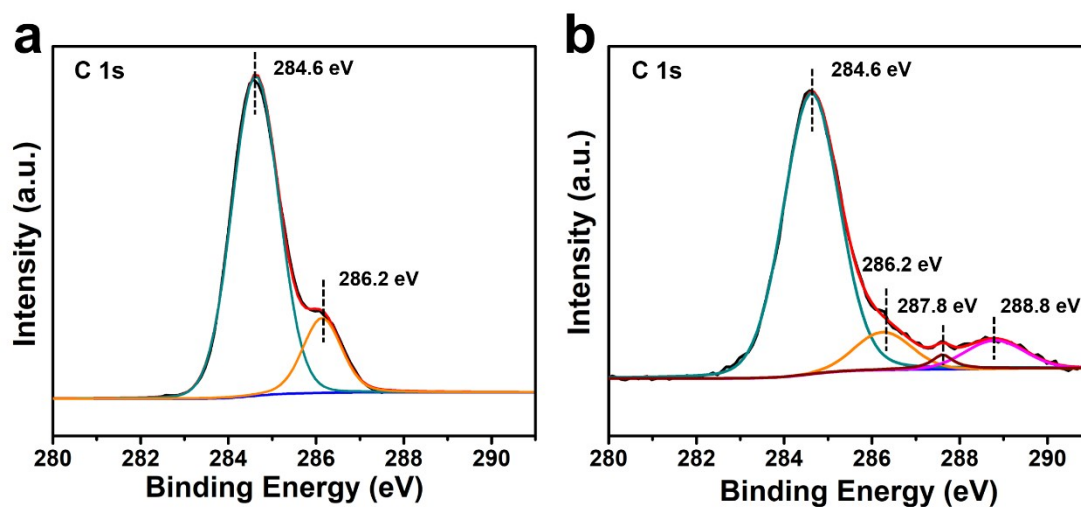

**Fig.S3** The C 1s XPS spectra of (a) RM-raw and (b) RM-7GO.

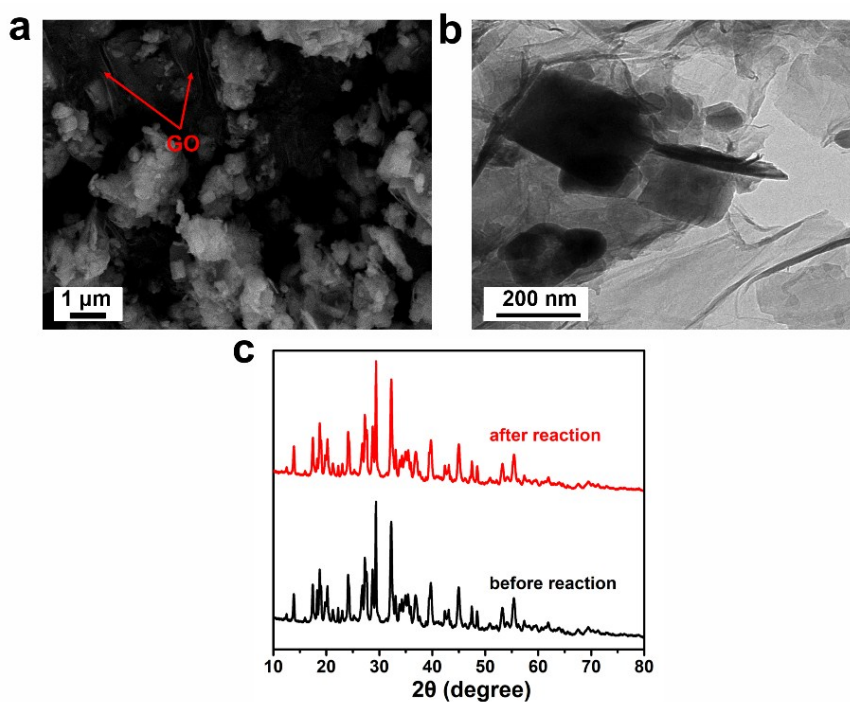

**Fig.S4** (a) SEM and (b) TEM images of RM-7GO after three cycles. (c) XRD patterns of RM-7GO before and after photocatalysis.
